# Supplementary material
Source: HighWire-hosted journal article supplement (https://rmdopen.bmj.com/content/9/1/e002663)
Supplement: inline-supplementary-material-1 [file inline-supplementary-material-1.pdf]

1 **SUPPLEMENTARY MATERIALS**

2

3

4 **Work participation in patients with axial spondyloarthritis: High prevalence of negative**  
5 **workplace experiences and long-term work impairment**

6 Uta Kiltz, Kirsten Hoeper, Ludwig Hammel, Sebastian Lieb, Andreas Hähle, Dirk Meyer-Olson

7

8 **Contents: Supplementary Tables S1 – S8 and Supplementary Figure legends S1 – S4**

9

10

11

12

13

14

15

16

17

18

19

20

21

22

23

24

25

26

27

28

29

30

## 31 Supplementary Table 1. List of study investigators at each participating site

32

| Site No. | Investigator and other important participants | Position / Role        | Site address                                                                                                                             | Patients enrolled |
|----------|-----------------------------------------------|------------------------|------------------------------------------------------------------------------------------------------------------------------------------|-------------------|
| 1        | Prof. Dr. med. Dirk Meyer-Olson               | Principal Investigator | Medizinische Hochschule Hannover, Hannover, 30625 Germany<br>m&i Fachklinik Bad Pyrmont/MVZ<br>Weserbergland, Bad Pyrmont, 31812 Germany | 134               |
|          | Christiane Bartels                            | Study Nurse            |                                                                                                                                          |                   |
|          | Elif Sensu                                    | Study Nurse            |                                                                                                                                          |                   |
|          | Nadine Lowald                                 | Study Nurse            |                                                                                                                                          |                   |
|          | Katharina Falke                               | Study Nurse            |                                                                                                                                          |                   |
| 2        | PD Dr. med. Uta Kiltz                         | Principal Investigator | Rheumazentrum Ruhrgebiet, Herne, 44649 Germany<br>Ruhr Universität, Bochum, 44801 Germany                                                | 102               |
|          | Dr. med. Ioana Andreica                       | Sub-Investigator       |                                                                                                                                          |                   |
|          | Styliani Tsiami                               | Sub-Investigator       |                                                                                                                                          |                   |
|          | Doris Morzeck                                 | Study Nurse            |                                                                                                                                          |                   |
|          | Dagmar Krinitzki                              | Study Nurse            |                                                                                                                                          |                   |
|          | Gordana Brnos                                 | Study Nurse            |                                                                                                                                          |                   |
| 3        | Prof. Dr. med. Torsten Witte                  | Principal Investigator | Medizinische Hochschule Hannover, Hannover, 30625 Germany                                                                                | 26                |
|          | Dr. med. Elke Riechers                        | Sub-Investigator       |                                                                                                                                          |                   |
|          | Alexandra Röhl                                | Study Nurse            |                                                                                                                                          |                   |
|          | Gudrun Melke                                  | Study Nurse            |                                                                                                                                          |                   |
| 4        | Prof. Dr. med. Monika Reuss-Borst             | Principal Investigator | Bad Bocklet, 97708 Germany                                                                                                               | 9                 |
| 5        | Dr. med. Gabriele Lorenz                      | Principal Investigator | Chemnitz, 09130 Germany                                                                                                                  | 45                |
|          | Claudia Richter                               | Study Nurse            |                                                                                                                                          |                   |
| 6        | Dr. med. Florian Haas                         | Principal Investigator | Tübingen, 72072 Germany                                                                                                                  | 79                |
|          | Katja Backes                                  | Study Nurse            |                                                                                                                                          |                   |
| 7        | Dr. Ilka Schwarze                             | Principal Investigator | Leipzig, 04129 Germany                                                                                                                   | 90                |
|          | Melanie Faust                                 | Study Nurse            |                                                                                                                                          |                   |
| 8        | Dr. med. Peter Kästner                        | Principal Investigator | Erfurt, 99096 Germany                                                                                                                    | 3                 |
|          | Dr. Karsten Brose                             | Sub-Investigator       |                                                                                                                                          |                   |
|          | Cornelia Gehlhaas                             | Study Nurse            |                                                                                                                                          |                   |
|          | Daniela Freuße-Stöber                         | Study Nurse            |                                                                                                                                          |                   |
| 9        | Dr. med. Christina Eisterhues                 | Principal Investigator | Braunschweig, 38100 Germany                                                                                                              | 7                 |
|          | Corinna Ebeling                               | Study Nurse            |                                                                                                                                          |                   |
| 10       | Dr. med. Silke Zinke                          | Principal Investigator | Berlin, 13055 Germany                                                                                                                    | 41                |
|          | Kristina Lunkowitz                            | Study Nurse            |                                                                                                                                          |                   |
| 11       | Dr. med. Thomas Kupka                         | Principal Investigator | Altenburg, 04600 Germany                                                                                                                 | 24                |
|          | Jessica Hübner                                | Study Nurse            |                                                                                                                                          |                   |
| 12       | Prof. Dr. med. Herbert Kellner                | Principal Investigator | München, 80639 Germany                                                                                                                   | 154               |
|          | Ruta Tautkute                                 | Study Nurse            |                                                                                                                                          |                   |
| 13       | Dr. med. Thilo Klopsch                        | Principal Investigator | Neubrandenburg, 17033 Germany                                                                                                            | 82                |
|          | Caroline Martin                               | Study Nurse            |                                                                                                                                          |                   |
| 14       | PD Dr. med. Hans-Eckhard Langer               | Principal Investigator | Düsseldorf, 40217 Germany                                                                                                                | 1                 |
|          | Rebekka Gabernig                              | Study Nurse            |                                                                                                                                          |                   |
|          | Janine Altena                                 | Study Nurse            |                                                                                                                                          |                   |

33

34 **Supplementary Table 2. Characteristics of the Full Study Population (n=770) concerning**  
 35 **family status, health insurance, diagnosis, and medication.**

| Characteristic                                                                                                                       | Statistic  |
|--------------------------------------------------------------------------------------------------------------------------------------|------------|
| <b>Family status</b>                                                                                                                 |            |
| In a committed relationship (married / living together), % (n)                                                                       | 67.7 (521) |
| Have children, % (n)                                                                                                                 | 65.5 (504) |
| Number of children (n=504) (%):                                                                                                      |            |
| 1                                                                                                                                    | 39.1       |
| 2                                                                                                                                    | 46.2       |
| 3                                                                                                                                    | 12.1       |
| 4                                                                                                                                    | 2.2        |
| 5                                                                                                                                    | 0.4        |
| HLA-B27 positive children (n=504), % (n)                                                                                             | 9.7 (49)   |
| Not specified                                                                                                                        | 48.4 (244) |
| How many (n=504), n (%)                                                                                                              |            |
| 1                                                                                                                                    | 83.7 (42)  |
| 2                                                                                                                                    | 12.2 (6)   |
| 3                                                                                                                                    | 4.1 (2)    |
| <b>Health insurance</b>                                                                                                              |            |
| Type of health insurance (multiple answers possible), % (n)                                                                          |            |
| Statutory                                                                                                                            | 95.1 (732) |
| Have ever been privately insured and decided to switch to statutory health insurance because of their axSpA condition (n=732), % (n) | 1.1 (8)    |
| Private                                                                                                                              | 4.9 (38)   |
| Have ever considered switching to statutory health insurance to have lower health insurance costs in old age (n=38), % (n)           | 29.0 (11)  |
| Have a private supplementary insurance, % (n)                                                                                        | 18.6 (143) |
| Are afraid of being excluded from private supplementary insurance because of their axSpA condition (n=143), % (n)                    | 15.4 (22)  |
| Claim benefits from long-term care insurance due to their axSpA condition, % (n)                                                     | 1.3 (10)   |
| Degree of care (degrees 1 to 5 where 0 is the lowest and 5 the highest) (n=10), % (n)                                                |            |
| Degree 1                                                                                                                             | 30.0 (3)   |
| Degree 2                                                                                                                             | 60.0 (6)   |
| Degree 3                                                                                                                             | 10.0 (1)   |
| Degree 4                                                                                                                             | 0.0 (0)    |
| Degree 5                                                                                                                             | 0.0 (0)    |
| <b>Diagnosis</b>                                                                                                                     |            |
| axSpA diagnosis by rheumatologist, % (n)                                                                                             | 77.7 (598) |
| axSpA diagnosis by another physician, % (n)                                                                                          |            |
| Orthopedist                                                                                                                          | 12.6 (97)  |
| General practitioner                                                                                                                 | 5.2 (40)   |
| Ophthalmologist                                                                                                                      | 0.9 (7)    |
| Gastroenterologist                                                                                                                   | 0.3 (2)    |
| Dermatologist                                                                                                                        | 0.0 (0)    |
| Other specialised physician                                                                                                          | 3.4 (26)   |
| Feel well educated about their axSpA condition, % (n))                                                                               | 88.7 (683) |
| Informed their private environment about their disease, % (n)                                                                        | 95.1 (732) |
| Informed their professional environment about their disease, % (n)                                                                   | 73.5 (566) |

**Biologic treatment**

|                          |            |
|--------------------------|------------|
| Taken NSAIDs, % (n)      |            |
| Currently                | 22.2 (171) |
| Currently and previously | 29.0 (223) |
| Previously               | 38.6 (297) |
| Never                    | 10.3 (79)  |
| Taken DMARDs, % (n)      |            |
| Currently                | 10.5 (81)  |
| Currently and previously | 4.3 (33)   |
| Previously               | 27.9 (215) |
| Never                    | 57.3 (441) |
| Taken biologics, % (n)   |            |
| Currently                | 35.3 (272) |
| Currently and previously | 16.1 (124) |
| Previously               | 8.8 (68)   |
| Taken biologics, % (n)   |            |
| Never                    | 39.7 (306) |

**PROs**

|                                                                                         |           |
|-----------------------------------------------------------------------------------------|-----------|
| BASDAI extreme values ( $\geq 8$ for at least three of the first five questions), % (n) | 11.0 (85) |
|-----------------------------------------------------------------------------------------|-----------|

AxSpA, axial spondyloarthritis; BASDAI, Bath Ankylosing Spondylitis Disease Activity Index; DMARDs, disease-modifying anti-rheumatic drugs; NSAIDs, non-steroidal anti-inflammatory drugs; PRO, patient-reported outcome; SD, standard deviation

36

37 **Supplementary Table 3. Univariate and multivariate logistic regression with WP as target**  
 38 **variable (unimpaired n=377) of the  $\leq 47$  years age sub-group**

| Predictors                                  | Impaired WP<br>(n=215) | Unimpaired WP<br>(n=162) | $\beta_j$<br>[constant<br>$\beta_0$ ] | OR        | 95% CI           | $\chi^2^*$ | p-value |
|---------------------------------------------|------------------------|--------------------------|---------------------------------------|-----------|------------------|------------|---------|
| <b>Univariate logistic regression</b>       |                        |                          |                                       |           |                  |            |         |
| <b>General demographic characterization</b> |                        |                          |                                       |           |                  |            |         |
| Age (years), mean $\pm$ SD                  | 36.7 $\pm$ 6.9         | 37.0 $\pm$ 6.4           | 0.007<br>[-0.531]                     | 1.00<br>7 | 0.976 –<br>1.038 | 0.19       | 0.667   |
| BMI, mean $\pm$ SD                          | 27.5 $\pm$<br>14.0     | 26.1 $\pm$ 4.5           | -0.016<br>[0.137]                     | 0.98<br>4 | 0.957 –<br>1.012 | 1.73       | 0.268   |
| Male, % (n)                                 | 57.7<br>(124)          | 73.5<br>(119)            | 0.709<br>[-0.750]                     | 2.03<br>1 | 1.306 –<br>3.158 | 10.21      | 0.002   |
| University education, % (n)                 | 23.7 (51)              | 37.7 (61)                | 0.664<br>[-0.485]                     | 1.94<br>2 | 1.242 –<br>3.037 | 8.54       | 0.004   |
| In a committed relationship, % (n)          | 60.9<br>(131)          | 58.6 (95)                | -0.095<br>[-0.226]                    | 0.90<br>9 | 0.600 –<br>1.378 | 0.20       | 0.654   |
| <b>Work characterization</b>                |                        |                          |                                       |           |                  |            |         |
| Full time employment, % (n)                 | 62.8<br>(135)          | 85.2<br>(138)            | 1.226<br>[-1.204]                     | 3.40<br>7 | 2.038 –<br>5.698 | 24.37      | <0.001  |

4

|                                                 |            |            |          |      |         |        |                 |
|-------------------------------------------------|------------|------------|----------|------|---------|--------|-----------------|
| Short-term absenteeism (WPAI-axSpA), mean ± SD  | 0.2 ± 0.3  | 0.0 ± 0.0  |          |      |         |        |                 |
| Short-term presenteeism (WPAI-axSpA), mean ± SD | 0.5 ± 0.2  | 0.1 ± 0.1  |          |      |         |        |                 |
| <b>Clinical characterization</b>                |            |            |          |      |         |        |                 |
| Disease duration (years)                        | 9.0 ± 9.0  | 10.5 ± 9.2 | 0.017    | 1.01 | 0.995 – | 2.32   | 0.131           |
|                                                 |            |            | [-0.452] | 8    | 1.041   |        |                 |
| Biologic treatment, % (n)                       | 47.0 (101) | 58.6 (95)  | 0.470    | 1.60 | 1.060 – | 5.05   | 0.025           |
|                                                 |            |            | [-0.532] | 0    | 2.416   |        |                 |
| <b>PROs</b>                                     |            |            |          |      |         |        |                 |
| ASAS-HI, mean ± SD                              | 7.8 ± 3.4  | 3.4 ± 3.0  | -0.413   | 0.66 | 0.607 – | 138.82 | <0.001          |
|                                                 |            |            | [1.956]  | 2    | 0.722   |        |                 |
| BASDAI, mean ± SD                               | 4.7 ± 2.0  | 2.0 ± 1.2  | -0.852   | 0.42 | 0.360 – | 171.05 | <0.001          |
|                                                 |            |            | [2.424]  | 7    | 0.506   |        |                 |
| BASDAI ≥4, % (n)                                | 63.7 (137) | 9.9 (16)   | -2.774   | 0.06 | 0.035 – | 123.08 | <0.001          |
|                                                 |            |            | [0.627]  | 2    | 0.112   | 3      |                 |
| BASDAI Fatigue, mean ± SD                       | 5.8 ± 2.3  | 2.8 ± 2.1  | -0.567   | 0.56 | 0.505 – | 135.65 | <0.001          |
|                                                 |            |            | [2.102]  | 7    | 0.638   |        |                 |
| BASDAI Duration morning stiffness, mean ± SD    | 3.5 ± 2.5  | 1.6 ± 1.8  | -0.461   | 0.63 | 0.553 – | 68.76  | <0.001          |
|                                                 |            |            | [0.793]  | 1    | 0.719   |        |                 |
| BASFI, mean ± SD                                | 3.7 ± 2.3  | 1.2 ± 1.4  | -0.766   | 0.46 | 0.391 – | 137.64 | <0.001          |
|                                                 |            |            | [1.359]  | 5    | 0.552   |        |                 |
| <b>Multivariate logistic regression</b>         |            |            |          |      |         |        |                 |
| Constant                                        |            |            | 2.885    |      |         |        |                 |
| ASAS-HI                                         |            |            | -0.178   | 0.83 | 0.745 – |        | 0.003           |
|                                                 |            |            |          | 7    | 0.940   |        |                 |
| BASDAI                                          |            |            | -0.513   | 0.59 | 0.406 – |        | 0.010           |
|                                                 |            |            |          | 9    | 0.883   |        |                 |
| BASDAI ≥4                                       |            |            | 0.027    | 1.02 | 0.368 – |        | 0.959           |
|                                                 |            |            |          | 8    | 2.867   |        |                 |
| BASDAI Fatigue                                  |            |            | -0.067   | 0.93 | 0.773 – |        | 0.494           |
|                                                 |            |            |          | 6    | 1.133   |        |                 |
| BASDAI Duration morning stiffness               |            |            | 0.034    | 1.03 | 0.866 – |        | 0.706           |
|                                                 |            |            |          | 5    | 1.236   |        |                 |
| BASFI                                           |            |            | -0.175   | 0.83 | 0.662 – |        | 0.148           |
|                                                 |            |            |          | 9    | 1.064   |        |                 |
| Full model                                      |            |            |          |      | 192.54  |        | <b>&lt;.001</b> |

BASDAI, Bath Ankylosing Spondylitis Disease Activity Index; BASFI, Bath Ankylosing Spondylitis Functional Index;  $\beta_j$ , regression coefficient; ASAS-HI, Assessment of SpondyloArthritis International Society-Health Index; BMI, body mass index; CI, confidence interval; df, degrees of freedom; n, number of patients; OR, odds ratio calculated as  $\exp(\beta_j)$ ; SD, standard deviation; WP, work participation;  $\chi^2$ , Chi-squared statistic

\*For univariate models df=1; for the multivariate full model df=14

40 **Supplementary Table 4. Univariate and multivariate logistic regression with WP as target**41 **variable (unimpaired n=318) of the >47 years age sub-group**

| Predictors                                                | Impaired WP<br>(n=238) | Unimpaired WP<br>(n=80) | $\beta_j$<br>[constant<br>$\beta_0$ ] | OR        | 95% CI           | $\chi^2^*$ | p-value |
|-----------------------------------------------------------|------------------------|-------------------------|---------------------------------------|-----------|------------------|------------|---------|
| <b>Univariate logistic regression</b>                     |                        |                         |                                       |           |                  |            |         |
| <b>General demographic characterization</b>               |                        |                         |                                       |           |                  |            |         |
| Age (years), mean $\pm$ SD                                | 55.6 $\pm$ 4.6         | 54.5 $\pm$ 5.1          | -0.055<br>[1.926]                     | 0.94<br>7 | 0.894 –<br>1.002 | 3.72       | 0.060   |
| BMI, mean $\pm$ SD                                        | 29.4 $\pm$<br>14.0     | 28.8 $\pm$ 9.6          | -0.004 [-<br>0.974]                   | 0.99<br>6 | 0.974 –<br>1.018 | 0.14       | 0.723   |
| Male, % (n)                                               | 51.3<br>(122)          | 73.8 (59)               | 0.983 [-<br>1.709]                    | 2.67<br>1 | 1.527 –<br>4.673 | 12.84      | < 0.001 |
| University education, %<br>(n)                            | 22.3 (53)              | 72.5 (58)               | 0.281 [-<br>1.160]                    | 1.32<br>4 | 0.743 –<br>2.360 | 0.89       | 0.341   |
| In a committed<br>relationship, % (n)                     | 75.2<br>(179)          | 80.0 (64)               | 0.276 [-<br>1.305]                    | 1.31<br>8 | 0.708 –<br>2.455 | 0.78       | 0.384   |
| <b>Work characterization</b>                              |                        |                         |                                       |           |                  |            |         |
| Full time employment, %<br>(n)                            | 50.8<br>(121)          | 80.0 (64)               | 1.353<br>[-1.990]                     | 3.86<br>8 | 2.114 –<br>7.075 | 22.37      | <0.001  |
| Short-term absenteeism<br>(WPAI-axSpA), mean $\pm$<br>SD  | 0.2 $\pm$ 0.3          | 0.0 $\pm$ 0.0           |                                       |           |                  |            |         |
| Short-term presenteeism<br>(WPAI-axSpA), mean $\pm$<br>SD | 0.5 $\pm$ 0.2          | 0.1 $\pm$ 0.1           |                                       |           |                  |            |         |
| <b>Clinical characterization</b>                          |                        |                         |                                       |           |                  |            |         |
| Disease duration (years)                                  | 16.1 $\pm$<br>12.2     | 16.7 $\pm$<br>10.9      | 0.004<br>[-1.162]                     | 1.00<br>4 | 0.983 –<br>1.026 | 0.16       | 0.687   |
| Biologic treatment, % (n)                                 | 54.2<br>(129)          | 50.0 (40)               | -0.168<br>[-1.002]                    | 0.84<br>5 | 0.509 –<br>1.403 | 0.42       | 0.515   |
| ASAS-HI, mean $\pm$ SD                                    | 8.2 $\pm$ 3.2          | 4.3 $\pm$ 3.0           | -0.408<br>[1.420]                     | 0.66<br>5 | 0.597 –<br>0.740 | 82.13      | <0.001  |
| BASDAI, mean $\pm$ SD                                     | 4.9 $\pm$ 1.8          | 2.3 $\pm$ 1.6           | -0.953<br>[2.231]                     | 0.38<br>6 | 0.306 –<br>0.486 | 115.89     | < 0.001 |
| BASDAI $\geq$ 4, % (n)                                    | 66.8<br>(159)          | 16.3 (13)               | -2.339<br>[-0.165]                    | 0.09<br>6 | 0.050 –<br>0.185 | 65.19      | <0.001  |
| BASDAI Fatigue, mean $\pm$<br>SD                          | 5.8 $\pm$ 2.0          | 2.9 $\pm$ 2.0           | -0.691<br>[1.857]                     | 0.50<br>1 | 0.423 –<br>0.594 | 102.28     | <0.001  |
| BASDAI Duration<br>morning stiffness, mean<br>$\pm$ SD    | 3.5 $\pm$ 2.4          | 1.7 $\pm$ 1.7           | -0.502<br>[0.135]                     | 0.60<br>5 | 0.506 –<br>0.724 | 45.13      | <0.001  |
| BASFI, mean $\pm$ SD                                      | 4.8 $\pm$ 2.2          | 2.2 $\pm$ 1.6           | -0.650<br>[1.092]                     | 0.52<br>2 | 0.439 –<br>0.621 | 84.15      | <0.001  |

**Multivariate logistic regression**

|                                   |        |           |                  |                 |
|-----------------------------------|--------|-----------|------------------|-----------------|
| Constant                          | 3.432  |           |                  |                 |
| ASAS-HI                           | -0.122 | 0.88<br>5 | 0.772 –<br>1.015 | 0.081           |
| BASDAI                            | -0.691 | 0.50<br>1 | 0.305 –<br>0.824 | <b>0.006</b>    |
| BASDAI $\geq 4$                   | 1.049  | 2.85<br>6 | 0.866 –<br>9.418 | 0.085           |
| BASDAI Fatigue                    | -0.172 | 0.84<br>2 | 0.641 –<br>1.104 | 0.214           |
| BASDAI Duration morning stiffness | -0.096 | 0.90<br>9 | 0.738 –<br>1.120 | 0.369           |
| BASFI                             | -0.227 | 0.79<br>7 | 0.628 –<br>1.011 | 0.061           |
| Full model                        |        |           | 133.81           | <b>&lt;.001</b> |

$\beta_j$ , regression coefficient; ASAS-HI, Assessment of SpondyloArthritis International Society-Health Index; BASDAI, Bath Ankylosing Spondylitis Disease Activity Index; BASFI, Bath Ankylosing Spondylitis Functional Index; BMI, body mass index; CI, confidence interval; df, degrees of freedom; n, number of patients; OR, odds ratio calculated as  $\exp(\beta_j)$ ; WP, work participation;  $\chi^2$ , Chi-squared statistic  
\*For univariate models df=1; for the multivariate full model df=14

42

43 **Supplementary Table 5. Impact of axSpA on the ability to work and participation in**  
 44 **vocational reintegration and rehabilitation programs in the WP Study Population (n=695).**

| Characteristic                                                                                                                                                 | Statistic       |
|----------------------------------------------------------------------------------------------------------------------------------------------------------------|-----------------|
| <b>Impact of axSpA at work / the ability to work</b>                                                                                                           |                 |
| Have ever been "slowed down" professionally by their axSpA / have had a change of plans due to their axSpA, % (n)                                              |                 |
| Has already happened frequently                                                                                                                                | 8.6 (60)        |
| Has already happened                                                                                                                                           | 33.2 (231)      |
| Has never happened                                                                                                                                             | 27.6 (192)      |
| The vocational situation has even improved to due axSpA                                                                                                        | 1.0 (7)         |
| Does not apply                                                                                                                                                 | 29.5 (205)      |
| Have ever been treated differently from colleagues at work because of their axSpA, % (n)                                                                       | 25.6 (178)      |
| Not specified                                                                                                                                                  | 8.2 (57)        |
| Feel that their axSpA has an impact on the amount of their salary (e.g., raises), % (n)                                                                        |                 |
| Already once                                                                                                                                                   | 5.0 (35)        |
| Already more often                                                                                                                                             | 4.3 (30)        |
| Not specified                                                                                                                                                  | 11.2 (78)       |
| Vocational reintegration and rehabilitation programs                                                                                                           |                 |
| Have previously participated in vocational reintegration programs (n=679, excluding patients not employed for other reasons than their axSpA condition), % (n) | 22.8 (155)      |
| Duration of taking part (n=155), mean $\pm$ SD                                                                                                                 | 11.8 $\pm$ 14.5 |
| Duration in weeks, % (n)                                                                                                                                       |                 |
| 1-2                                                                                                                                                            | 8.4 (13)        |
| 3-5                                                                                                                                                            | 33.5 (52)       |
| 6-9                                                                                                                                                            | 29.0 (45)       |

7

|                                                                                                               |            |
|---------------------------------------------------------------------------------------------------------------|------------|
| ≥ 10                                                                                                          | 29.0 (45)  |
| Have ever made use of an vocational rehabilitation program in the company (e.g., a retraining measure), % (n) | 10.2 (71)  |
| Did not know                                                                                                  | 4.5 (31)   |
| Times using the vocational rehabilitation program (n=71), % (n)                                               |            |
| 1                                                                                                             | 67.6 (48)  |
| 2                                                                                                             | 23.9 (17)  |
| 3                                                                                                             | 2.8 (2)    |
| 4                                                                                                             | 2.8 (2)    |
| 5                                                                                                             | 1.4 (1)    |
| 6                                                                                                             | 1.4 (1)    |
| Time since the last vocational rehabilitation program in years (n=71), % (n)                                  |            |
| < 1 year                                                                                                      | 18.3 (13)  |
| 1-4 years                                                                                                     | 31.0 (22)  |
| 5-9 years                                                                                                     | 9.9 (7)    |
| ≥ 10 years                                                                                                    | 40.8 (29)  |
| The vocational rehabilitation program was initiated by ... (n=71) (multiple answers possible), % (n)          |            |
| ... patients themselves                                                                                       | 33.8 (24)  |
| ... employment agency                                                                                         | 31.0 (22)  |
| ... pension insurance                                                                                         | 29.6 (21)  |
| ... rheumatologist                                                                                            | 21.1 (15)  |
| ... general practitioner                                                                                      | 18.3 (13)  |
| ... other specialised physician                                                                               | 8.5 (6)    |
| ... orthopedist                                                                                               | 4.2 (3)    |
| ... health insurance                                                                                          | 4.2 (3)    |
| ... company/ vocational physician                                                                             | 0.0 (0)    |
| ... unknown                                                                                                   | 4.2 (3)    |
| Had to change employers because of their axSpA condition, % (n)                                               | 14.1 (98)  |
| Not specified                                                                                                 | 4.5 (31)   |
| Due to their condition, occurred ... (multiple answers possible), % (n)                                       |            |
| ... a reorganisation of the workplace by the employer or the pension insurance                                | 18.0 (125) |
| ... an in-company transfer to a new position                                                                  | 5.8 (40)   |
| ... a retraining measure by the employment agency                                                             | 4.2 (29)   |
| ... a retraining measure by the pension insurance                                                             | 2.7 (19)   |
| ... an in-company retraining to a new position                                                                | 1.6 (11)   |
| ... a retraining measure in an vocational promotion center                                                    | 1.6 (11)   |
| Neither of the above.                                                                                         | 71.7 (498) |

AxSpA, axial spondyloarthritis; n, number of patients; SD, standard deviation; WP, work participation

45

46

47

48



**Supplementary Table 6. Pearson correlation, VIF, and CI to verify model assumptions of independence of the explanatory variables.**

|                                          | Age    | BMI    | Male   | University education | In a committed relationship | Disease duration | ASAS-HI | BASDAI | BASDAI $\geq 4$ | BASFI  | BASDAI fatigue | BASDAI duration morning stiffness | Biologic treatment | Full time employment |
|------------------------------------------|--------|--------|--------|----------------------|-----------------------------|------------------|---------|--------|-----------------|--------|----------------|-----------------------------------|--------------------|----------------------|
| <b>Age</b>                               | -      | 0.083  | 0.043  | -0.034               | 0.238                       | 0.395            | 0.164   | 0.116  | 0.101           | 0.312  | 0.050          | 0.083                             | 0.003              | -0.308               |
| <b>BMI</b>                               | 0.083  | -      | -0.022 | -0.024               | 0.018                       | 0.000            | 0.055   | 0.029  | 0.035           | 0.059  | 0.005          | 0.024                             | 0.064              | -0.023               |
| <b>Male</b>                              | 0.043  | -0.022 | -      | -0.078               | 0.010                       | -0.097           | 0.223   | 0.186  | 0.192           | 0.094  | 0.216          | 0.003                             | 0.007              | -0.289               |
| <b>University education</b>              | -0.034 | -0.024 | -0.008 | -                    | 0.008                       | 0.047            | -0.144  | -0.134 | -0.139          | -0.158 | -0.091         | -0.101                            | -0.112             | 0.061                |
| <b>In a committed relationship</b>       | 0.238  | 0.018  | 0.010  | 0.008                | -                           | 0.027            | 0.036   | 0.010  | 0.17            | 0.022  | -0.006         | 0.036                             | -0.012             | -0.073               |
| <b>Disease duration</b>                  | 0.395  | 0.000  | -0.097 | 0.047                | 0.027                       | -                | 0.042   | -0.016 | -0.043          | 0.141  | -0.030         | 0.016                             | -0.103             | -0.094               |
| <b>ASAS-HI</b>                           | 0.164  | 0.055  | 0.223  | -0.144               | 0.036                       | 0.042            | -       | 0.681  | 0.559           | 0.705  | 0.655          | 0.426                             | -0.029             | -0.260               |
| <b>BASDAI</b>                            | 0.116  | 0.029  | 0.186  | -0.134               | 0.010                       | -0.016           | 0.681   | -      | 0.839           | 0.752  | 0.847          | 0.641                             | 0.043              | -0.182               |
| <b>BASDAI <math>\geq 4</math></b>        |        |        |        |                      |                             |                  |         |        | -               |        |                |                                   |                    |                      |
| <b>BASFI</b>                             | 0.312  | 0.059  | 0.094  | -0.158               | 0.022                       | 0.141            | 0.705   | 0.752  | 0.644           | -      | 0.649          | 0.539                             | -0.017             | -0.278               |
| <b>BASDAI fatigue</b>                    | 0.050  | 0.005  | 0.216  | -0.091               | -0.006                      | -0.030           | 0.655   | 0.847  | 0.721           | 0.649  | -              | 0.458                             | -0.004             | -0.163               |
| <b>BASDAI duration morning stiffness</b> | 0.083  | 0.024  | 0.003  | -0.101               | 0.036                       | 0.016            | 0.426   | 0.641  | 0.507           | 0.539  | 0.458          | -                                 | -0.012             | -0.082               |
| <b>Biologic treatment</b>                | 0.003  | 0.064  | 0.007  | -0.112               | -0.012                      | -0.103           | -0.029  | 0.043  | -0.074          | -0.017 | -0.004         | -0.012                            | -                  | 0.000                |
| <b>Full time employment</b>              | -0.308 | -0.023 | -0.289 | 0.061                | -0.073                      | -0.094           | -0.260  | -0.182 | -0.150          | -0.278 | -0.163         | -0.082                            | 0.000              | -                    |
| <b>VIF*</b>                              | 1.370  | 1.026  | 1.352  | 1.053                | 1.143                       | 1.202            | 2.416   | 7.733  | 3.359           | 2.941  | 3.842          | 1.738                             | 1.069              | 1.257                |
| <b>CI*</b>                               | 2.989  | 4.127  | 4.146  | 5.099                | 5.533                       | 6.024            | 6.610   | 7.602  | 8.951           | 10.163 | 11.451         | 13.884                            | 20.329             | 24.593               |

ASAS-HI, Assessment of SpondyloArthritis International Society-Health Index; BASDAI, Bath Ankylosing Spondylitis Disease Activity Index; BASFI, Bath Ankylosing Spondylitis Functional Index; BMI, Body Mass Index; VIF, Variance inflation factor; CI, condition index

\* VIFs >10 and CIs >30 suggest multicollinearity.

**Supplementary Table 7. Model quality for variables of the univariate logistic regression (n=695).**

| Predictors                                  | -2 log likelihood* | R <sup>2</sup> <sub>N</sub> | R <sup>2</sup> <sub>CS</sub> | Classification table (%) |             |                    |
|---------------------------------------------|--------------------|-----------------------------|------------------------------|--------------------------|-------------|--------------------|
|                                             |                    |                             |                              | Correct prediction by WP |             | Overall prediction |
|                                             |                    |                             |                              | Unimpaired WP            | Impaired WP |                    |
| <b>General demographic characterisation</b> |                    |                             |                              |                          |             |                    |
| Age                                         | 878.523            | 0.040                       | 0.030                        | 2.9                      | 97.6        | 64.6               |
| BMI                                         | 895.346            | 0.010                       | 0.004                        | 0.0                      | 100.0       | 65.2               |
| Male                                        | 873.102            | 0.050                       | 0.040                        | 0.0                      | 100.0       | 65.2               |
| University education                        | 888.291            | 0.020                       | 0.010                        | 0.0                      | 100.0       | 65.2               |
| In a committed relationship                 | 897.860            | 0.001                       | 0.001                        | 0.0                      | 100.0       | 65.2               |
| <b>Work characterisation</b>                |                    |                             |                              |                          |             |                    |
| Full time employment                        | 843.709            | 0.100                       | 0.080                        | 0.0                      | 100.0       | 65.2               |
| <b>Clinical characterisation</b>            |                    |                             |                              |                          |             |                    |
| Disease duration                            | 898.337            | 0.000                       | 0.000                        | 0.0                      | 100.0       | 65.2               |
| Biologic treatment                          | 897.801            | 0.001                       | 0.001                        | 0.0                      | 100.0       | 65.2               |
| <b>PROs</b>                                 |                    |                             |                              |                          |             |                    |
| ASAS-HI                                     | 659.746            | 0.40                        | 0.29                         | 64.5                     | 84.8        | 77.7               |
| BASDAI                                      | 593.077            | 0.49                        | 0.36                         | 71.9                     | 88.1        | 82.4               |
| BASDAI ≥4                                   | 699.911            | 0.34                        | 0.25                         | 91.0                     | 57.57       | 73.2               |
| BASDAI Fatigue                              | 650.685            | 0.41                        | 0.3                          | 71.1                     | 83.4        | 79.1               |
| BASDAI Duration morning stiffness           | 777.644            | 0.22                        | 0.16                         | 63.2                     | 78.1        | 72.9               |
| BASFI                                       | 652.971            | 0.41                        | 0.30                         | 66.1                     | 84.1        | 77.8               |

---

ASAS-HI, Assessment of SpondyloArthritis International Society-Health Index; BASDAI, Bath Ankylosing Spondylitis Disease Activity Index; BASFI, Bath Ankylosing Spondylitis Functional Index; BMI, body mass index; df, degrees of freedom; n, number of patients;  $R^2_{cs}$ , Cox & Snell pseudo  $R^2$ ;  $R^2_N$ , Nagelkerke pseudo  $R^2$

\* Null model: 898.393

**Supplementary Table 8. Post-hoc Games-Howell-Test for PROs by different types of WP impairment (corresponding to Supplementary Figure 1).**

| Work impairment*   |                    | p-value by PRO†  |                  |                             |                  |                  |
|--------------------|--------------------|------------------|------------------|-----------------------------|------------------|------------------|
|                    |                    | BASDAI           | Fatigue‡         | Duration morning stiffness‡ | BASFI            | ASAS-HI          |
| Absenteeism        | Disability pension | 0.259            | 0.263            | 0.391                       | <b>&lt;0.001</b> | <b>&lt;0.001</b> |
| Absenteeism        | No employment      | 0.900            | 0.900            | 0.900                       | 0.181            | 0.787            |
| Absenteeism        | Presenteeism       | 0.253            | 0.751            | 0.900                       | 0.189            | 0.313            |
| Absenteeism        | Unimpaired WP      | <b>&lt;0.001</b> | <b>&lt;0.001</b> | <b>&lt;0.001</b>            | <b>&lt;0.001</b> | <b>&lt;0.001</b> |
| Disability pension | No employment      | 0.417            | 0.257            | 0.779                       | <b>0.012</b>     | 0.141            |
| Disability pension | Presenteeism       | <b>0.004</b>     | <b>0.020</b>     | 0.163                       | <b>&lt;0.001</b> | <b>&lt;0.001</b> |
| Disability pension | Unimpaired WP      | <b>&lt;0.001</b> | <b>&lt;0.001</b> | <b>&lt;0.001</b>            | <b>&lt;0.001</b> | <b>&lt;0.001</b> |
| No employment      | Presenteeism       | 0.586            | 0.900            | 0.702                       | <b>0.003</b>     | 0.088            |
| No employment      | Unimpaired WP      | <b>&lt;0.001</b> | <b>&lt;0.001</b> | <b>&lt;0.001</b>            | <b>&lt;0.001</b> | <b>&lt;0.001</b> |
| Presenteeism       | Unimpaired WP      | <b>&lt;0.001</b> | <b>&lt;0.001</b> | <b>&lt;0.001</b>            | <b>&lt;0.001</b> | <b>&lt;0.001</b> |

ASAS-HI, Assessment of SpondyloArthritis International Society-Health Index; BASDAI, Bath Ankylosing Spondylitis Disease Activity Index; BASFI, Bath Ankylosing Spondylitis Functional Index; PRO, patient-reported outcome; WP, work participation

\* Absenteeism and presenteeism were evaluated in the short-term (through the WPAI-axSpA).

Patients grouped under presenteeism as work impairment displayed presenteeism but no absenteeism, whereas patients displaying absenteeism were grouped under absenteeism independently of whether they showed presenteeism.

† Significant differences are indicated in bold. See Supplementary Figure 2 for a visual illustration of the group differences.

‡ Fatigue and duration morning stiffness as measured via the BASDAI.

**Supplementary figure legends**

**Supplementary Figure 1.** Disease duration (years) in the WP Study Population. (A) Disease duration and percentage frequency of disability pension and patients not working (B) disease duration and percentage frequency of absenteeism and presenteeism.

**Supplementary Figure 2.** Work hours lost in the last 7 days as measured by the WPAI-axSpA among all workers (n=590) in the WP Study Population. The majority of patients reported not having lost any work hours in the past week.

**Supplementary Figure 3.** Relationship between presenteeism and absenteeism, and presenteeism and impairment of daily activities in the WP Study Population. Scatterplots indicate that there was no relationship between (A) presenteeism and absenteeism, however, a positive relationship between (B) presenteeism and impairment of daily activities. The size of the dots depicts the relative number of patients represented.

**Supplementary Figure 4.** PROs by different types of WP impairment in the WP Study Population. Illustration of differences in the PROs (A) BASDAI, (B) BASDAI Fatigue, (C) BASDAI Duration morning stiffness, (D) BASFI, and (E) ASAS-HI by different types of work impairment. Patients with unimpaired WP had significantly lower disease activity (including less fatigue and duration morning stiffness), as well as better global functioning and physical function across all patients with WP impairment; significances of differences between groups are shown in Supplementary Table 6.
